# Supplementary material for: Variable outcomes of human heart attack recapitulated in genetically diverse mice
Source: PubMed Central journal article supplement (PMC6399323; doi:10.1038/s41536-019-0067-6), 2019-03-04

**Table S1 Summary of morphological and functional parameters of selected CC strains based on echocardiographic images  
12-week-old male mice in homeostasis**

| Strain / Parameter* | BWT (g)    | LV Mass (mg)  | ENDarea;d (mm <sup>2</sup> ) | ENDarea;s (mm <sup>2</sup> ) | EPIarea;d (mm <sup>2</sup> ) | EPIarea;s (mm <sup>2</sup> ) | Heart Length;d (mm) | Heart Length;s (mm) | FAC (%)      | EF (%)       | Stroke Volume (μL) | LV Volume;d (μL) | LV Volume;s (μL) | LVPW;d (mm) | LVPW;s (mm)  | PA Peak Pressure (mm Hg) |
|---------------------|------------|---------------|------------------------------|------------------------------|------------------------------|------------------------------|---------------------|---------------------|--------------|--------------|--------------------|------------------|------------------|-------------|--------------|--------------------------|
| 129X1/SvJArc (10)   | 28.6 ± 1.7 | 95.17 ± 7.27  | 13.30 ± 0.93                 | 7.41 ± 1.12                  | 24.64 ± 1.34                 | 20.23 ± 1.60                 | 7.29 ± 0.18         | 6.56 ± 0.16         | 44.44 ± 5.02 | 51.91 ± 4.80 | 34.94 ± 2.75       | 67.60 ± 4.78     | 32.65 ± 5.14     | 0.70 ± 0.03 | 1.00 ± 0.04  | 2.34 ± 0.34              |
| A/JArc (11)         | 24.1 ± 1.1 | 69.42 ± 8.47  | 9.62 ± 0.46                  | 5.09 ± 0.36                  | 18.90 ± 1.25                 | 15.61 ± 0.87                 | 6.63 ± 0.19         | 6.06 ± 0.15         | 46.96 ± 4.39 | 53.29 ± 3.47 | 25.67 ± 2.04       | 48.20 ± 3.10     | 22.54 ± 2.47     | 0.65 ± 0.06 | 1.04 ± 0.08  | 2.32 ± 0.44              |
| C57BL/6JArc (9)     | 26.3 ± 1.9 | 82.82 ± 7.05  | 13.13 ± 0.90                 | 8.03 ± 0.92                  | 22.30 ± 3.48                 | 18.18 ± 3.75                 | 6.97 ± 0.11         | 6.41 ± 0.16         | 38.86 ± 6.31 | 47.33 ± 4.91 | 32.04 ± 3.09       | 67.82 ± 4.01     | 35.78 ± 4.40     | 0.68 ± 0.06 | 0.97 ± 0.08  | 2.00 ± 0.38              |
| NOD/ShiLtJArc (11)  | 26.3 ± 2.2 | 78.95 ± 11.10 | 11.34 ± 0.74                 | 5.63 ± 0.84                  | 21.31 ± 1.71                 | 17.49 ± 1.67                 | 7.05 ± 0.19         | 6.25 ± 0.26         | 50.37 ± 6.51 | 57.53 ± 5.76 | 32.77 ± 3.84       | 56.91 ± 3.55     | 24.14 ± 3.63     | 0.73 ± 0.07 | 1.14 ± 0.10  | 2.63 ± 0.54              |
| BEM_AG (12)         | 30.7 ± 3.3 | 88.85 ± 5.60  | 10.80 ± 1.15                 | 5.38 ± 1.11                  | 22.16 ± 1.76                 | 18.52 ± 1.42                 | 6.99 ± 0.25         | 6.51 ± 0.17         | 50.57 ± 6.13 | 56.98 ± 6.05 | 30.99 ± 2.56       | 54.90 ± 6.71     | 23.91 ± 5.90     | 0.82 ± 0.06 | 1.42 ± 0.13  | 2.48 ± 0.49              |
| BOM_GB (15)         | 23.1 ± 1.7 | 89.92 ± 9.01  | 11.57 ± 1.16                 | 6.49 ± 0.90                  | 23.81 ± 1.91                 | 20.48 ± 1.85                 | 6.42 ± 0.23         | 5.89 ± 0.23         | 43.93 ± 5.69 | 51.03 ± 4.89 | 30.99 ± 3.86       | 54.90 ± 5.47     | 23.91 ± 3.77     | 0.80 ± 0.09 | 1.16 ± 0.11  | 2.97 ± 0.55              |
| BOON_HF (10)        | 30.2 ± 2.0 | 98.57 ± 10.19 | 12.14 ± 0.88                 | 7.27 ± 0.49                  | 23.97 ± 1.36                 | 20.11 ± 0.99                 | 7.36 ± 0.17         | 6.85 ± 0.19         | 39.90 ± 4.46 | 46.14 ± 3.61 | 31.34 ± 3.49       | 67.06 ± 5.65     | 35.72 ± 3.80     | 0.78 ± 0.07 | 1.14 ± 0.09  | 2.44 ± 0.33              |
| CIS_AD (8)          | 24.9 ± 2.4 | 99.55 ± 9.10  | 11.23 ± 1.21                 | 5.94 ± 1.05                  | 23.19 ± 1.96                 | 19.39 ± 1.59                 | 7.40 ± 0.31         | 6.69 ± 0.20         | 47.35 ± 5.44 | 55.03 ± 5.01 | 33.80 ± 4.64       | 61.54 ± 7.99     | 27.74 ± 5.24     | 0.87 ± 0.06 | 1.27 ± 0.11  | 2.37 ± 0.40              |
| DAVIS_BA (6)        | 23.8 ± 0.9 | 93.59 ± 9.51  | 12.04 ± 0.49                 | 7.73 ± 0.23                  | 23.45 ± 0.71                 | 19.54 ± 1.26                 | 7.29 ± 0.11         | 6.61 ± 0.15         | 35.68 ± 4.25 | 43.30 ± 5.05 | 29.44 ± 5.22       | 67.58 ± 4.73     | 38.14 ± 0.58     | 0.71 ± 0.08 | 1.07 ± 0.09  | 3.02 ± 0.40              |
| DOD_AH (6)          | 32.0 ± 2.3 | 106.97 ± 8.96 | 12.28 ± 1.37                 | 6.67 ± 0.64                  | 24.79 ± 2.12                 | 21.32 ± 2.26                 | 7.66 ± 0.19         | 7.12 ± 0.31         | 45.55 ± 1.40 | 52.16 ± 1.49 | 32.75 ± 5.31       | 59.21 ± 6.49     | 28.11 ± 2.50     | 0.97 ± 0.09 | 1.41 ± 0.13  | 1.97 ± 0.45              |
| DONNELL_HA (7)      | 26.4 ± 2.1 | 74.51 ± 10.31 | 9.18 ± 0.78                  | 5.49 ± 0.72                  | 19.47 ± 1.53                 | 17.10 ± 1.43                 | 6.37 ± 0.27         | 5.87 ± 0.19         | 40.05 ± 5.58 | 46.13 ± 6.33 | 20.52 ± 2.41       | 44.67 ± 3.01     | 24.15 ± 3.87     | 0.79 ± 0.13 | 1.24 ± 0.19  | 1.61 ± 0.49              |
| FEW_FD (11)         | 24.8 ± 1.5 | 101.91 ± 7.96 | 11.32 ± 1.02                 | 6.00 ± 0.93                  | 23.79 ± 1.82                 | 20.15 ± 2.18                 | 7.36 ± 0.22         | 6.82 ± 0.23         | 47.17 ± 4.81 | 53.13 ± 4.95 | 33.38 ± 3.54       | 63.14 ± 7.64     | 29.76 ± 6.09     | 0.98 ± 0.07 | 1.55 ± 0.15  | 2.56 ± 0.47              |
| FIM_DF (11)         | 23.9 ± 2.5 | 73.15 ± 11.41 | 10.06 ± 1.71                 | 6.45 ± 1.13                  | 19.66 ± 3.05                 | 17.04 ± 2.38                 | 6.75 ± 0.31         | 6.06 ± 0.27         | 35.70 ± 6.49 | 44.28 ± 6.57 | 22.94 ± 6.65       | 51.46 ± 9.85     | 28.52 ± 4.94     | 0.68 ± 0.09 | 0.98 ± 0.16  | 2.58 ± 1.09              |
| FIV_AC (10)         | 25.8 ± 2.3 | 95.20 ± 7.56  | 9.98 ± 0.98                  | 4.74 ± 0.54                  | 22.07 ± 0.99                 | 18.80 ± 1.24                 | 6.95 ± 0.23         | 6.26 ± 0.24         | 58.88 ± 4.80 | 58.85 ± 4.73 | 29.17 ± 3.08       | 49.53 ± 2.83     | 20.36 ± 2.46     | 0.83 ± 0.06 | 1.34 ± 0.10  | 1.60 ± 0.32              |
| GALASUPREME_CE (9)  | 28.1 ± 3.6 | 92.20 ± 11.20 | 9.92 ± 0.55                  | 6.35 ± 0.19                  | 20.80 ± 1.31                 | 19.49 ± 1.21                 | 7.56 ± 0.16         | 7.18 ± 0.27         | 35.81 ± 3.98 | 41.05 ± 4.65 | 20.87 ± 3.42       | 50.70 ± 3.78     | 29.83 ± 2.25     | 0.87 ± 0.06 | 1.14 ± 0.10  | 1.70 ± 0.35              |
| GIG_EF (13)         | 27.7 ± 1.8 | 81.62 ± 11.76 | 11.30 ± 1.12                 | 5.88 ± 0.76                  | 21.72 ± 2.00                 | 18.18 ± 1.71                 | 6.92 ± 0.41         | 6.39 ± 0.36         | 48.03 ± 3.36 | 54.00 ± 2.95 | 31.47 ± 4.02       | 58.39 ± 7.47     | 26.92 ± 4.25     | 0.78 ± 0.06 | 1.25 ± 0.08  | 4.27 ± 1.57              |
| GIT_GC (5)          | 33.1 ± 1.3 | 89.97 ± 6.97  | 12.27 ± 0.99                 | 8.90 ± 1.21                  | 24.12 ± 1.49                 | 21.43 ± 1.73                 | 6.6 ± 0.19          | 6.34 ± 0.12         | 27.70 ± 4.83 | 32.67 ± 3.77 | 20.83 ± 1.86       | 64.15 ± 6.29     | 43.32 ± 6.07     | 0.73 ± 0.10 | 0.95 ± 0.012 | 2.56 ± 0.70              |
| HAZ_FE (6)          | 19.4 ± 1.3 | 81.38 ± 8.00  | 11.90 ± 0.82                 | 6.46 ± 0.46                  | 22.24 ± 1.28                 | 18.35 ± 1.83                 | 6.96 ± 0.18         | 6.34 ± 0.16         | 44.77 ± 1.67 | 49.49 ± 3.69 | 31.51 ± 2.38       | 63.85 ± 5.47     | 32.34 ± 4.68     | 0.68 ± 0.08 | 1.02 ± 0.015 | 3.41 ± 0.73              |
| JUNIOR_GB (6)       | 23.2 ± 3.4 | 86.80 ± 11.59 | 9.67 ± 1.16                  | 5.76 ± 0.90                  | 20.41 ± 1.82                 | 17.21 ± 1.66                 | 7.30 ± 0.47         | 6.69 ± 0.46         | 40.52 ± 5.77 | 47.22 ± 5.54 | 25.10 ± 3.09       | 53.53 ± 7.35     | 28.44 ± 5.95     | 0.84 ± 0.11 | 1.20 ± 0.16  | 2.24 ± 0.52              |
| LUZ_FH (5)          | 23.1 ± 1.6 | 89.68 ± 7.61  | 11.32 ± 0.99                 | 5.79 ± 0.55                  | 23.27 ± 1.35                 | 20.05 ± 1.27                 | 6.50 ± 0.10         | 5.76 ± 0.13         | 48.72 ± 4.59 | 57.17 ± 3.56 | 27.82 ± 1.60       | 48.71 ± 2.21     | 20.89 ± 2.37     | 0.76 ± 0.04 | 1.05 ± 0.07  | 3.15 ± 0.52              |
| MERCURI_HF (5)      | 28.0 ± 3.5 | 92.71 ± 10.26 | 11.86 ± 0.96                 | 7.16 ± 0.78                  | 23.56 ± 1.33                 | 20.50 ± 0.75                 | 7.00 ± 0.34         | 6.53 ± 0.44         | 39.68 ± 4.86 | 45.14 ± 4.59 | 27.44 ± 3.41       | 60.89 ± 5.63     | 33.45 ± 4.56     | 0.73 ± 0.04 | 1.02 ± 0.07  | 2.08 ± 0.45              |
| NUK_AC (11)         | 32.4 ± 2.5 | 113.42 ± 7.98 | 12.58 ± 1.46                 | 7.38 ± 1.15                  | 26.32 ± 1.87                 | 23.39 ± 1.86                 | 7.22 ± 0.42         | 6.75 ± 0.39         | 38.19 ± 6.87 | 46.22 ± 6.25 | 30.64 ± 5.85       | 66.27 ± 8.74     | 35.62 ± 6.05     | 0.87 ± 0.11 | 1.31 ± 0.14  | 1.86 ± 0.72              |
| PAT_CD (6)          | 25.5 ± 1.2 | 102.58 ± 7.53 | 13.93 ± 0.97                 | 8.30 ± 1.34                  | 26.12 ± 1.12                 | 22.21 ± 1.15                 | 7.42 ± 0.19         | 6.81 ± 0.21         | 40.58 ± 7.09 | 46.82 ± 7.41 | 34.83 ± 6.06       | 74.38 ± 6.47     | 39.55 ± 6.80     | 0.79 ± 0.12 | 1.15 ± 0.17  | 2.47 ± 0.74              |
| PEF_EC (11)         | 30.3 ± 1.8 | 83.56 ± 6.40  | 9.77 ± 0.78                  | 4.81 ± 0.26                  | 21.49 ± 0.58                 | 18.54 ± 1.00                 | 6.17 ± 0.30         | 5.54 ± 0.32         | 50.68 ± 2.51 | 59.37 ± 1.45 | 25.45 ± 2.03       | 42.88 ± 3.46     | 17.44 ± 1.65     | 0.92 ± 0.12 | 1.38 ± 0.16  | 2.83 ± 0.48              |
| POH_DC (5)          | 27.5 ± 1.3 | 90.31 ± 10.86 | 9.75 ± 0.56                  | 5.05 ± 0.14                  | 21.45 ± 1.50                 | 17.65 ± 1.25                 | 6.80 ± 0.26         | 6.41 ± 0.14         | 48.01 ± 4.35 | 52.52 ± 4.85 | 26.26 ± 5.66       | 49.65 ± 6.71     | 23.40 ± 2.18     | 0.75 ± 0.05 | 1.22 ± 0.12  | 2.66 ± 0.84              |
| PUB_CD (6)          | 23.0 ± 2.2 | 64.39 ± 5.82  | 9.09 ± 0.90                  | 5.47 ± 0.92                  | 18.60 ± 1.44                 | 15.68 ± 1.65                 | 5.92 ± 0.25         | 5.54 ± 0.26         | 40.04 ± 6.79 | 46.63 ± 6.37 | 16.86 ± 1.90       | 36.42 ± 3.96     | 19.56 ± 4.01     | 0.65 ± 0.07 | 0.95 ± 0.10  | 2.09 ± 0.73              |
| SAT_GA (9)          | 28.7 ± 2.2 | 16.61 ± 4.08  | 11.06 ± 0.25                 | 7.77 ± 0.64                  | 23.23 ± 0.89                 | 20.95 ± 0.61                 | 36.60 ± 5.66        | 6.84 ± 0.46         | 36.86 ± 5.47 | 36.73 ± 5.56 | 19.20 ± 3.49       | 52.38 ± 6.72     | 33.18 ± 5.68     | 6.38 ± 0.24 | 0.82 ± 0.07  | 2.04 ± 0.33              |
| TAS_FE (7)          | 18.7 ± 1.5 | 53.58 ± 5.75  | 8.98 ± 0.82                  | 6.16 ± 0.65                  | 16.42 ± 0.84                 | 14.20 ± 0.79                 | 6.44 ± 0.26         | 6.01 ± 0.20         | 31.15 ± 6.30 | 38.36 ± 4.98 | 15.89 ± 3.05       | 41.96 ± 5.02     | 26.23 ± 2.91     | 0.56 ± 0.07 | 0.82 ± 0.10  | 1.34 ± 0.23              |
| TOFU_FB (13)        | 25.4 ± 1.6 | 81.15 ± 4.97  | 9.03 ± 3.25                  | 5.30 ± 0.74                  | 20.07 ± 1.39                 | 17.38 ± 1.26                 | 6.69 ± 0.13         | 6.33 ± 0.17         | 41.53 ± 4.41 | 47.44 ± 5.69 | 21.71 ± 1.32       | 46.16 ± 4.51     | 24.45 ± 4.86     | 0.85 ± 0.12 | 1.26 ± 0.20  | 3.14 ± 0.74              |
| TOP_DA (8)          | 26.0 ± 1.9 | 98.73 ± 11.23 | 12.76 ± 0.86                 | 7.20 ± 0.67                  | 24.83 ± 2.00                 | 21.17 ± 1.54                 | 7.02 ± 0.30         | 6.45 ± 0.27         | 43.55 ± 3.86 | 50.20 ± 4.61 | 32.69 ± 3.33       | 66.83 ± 4.48     | 33.25 ± 3.71     | 0.82 ± 0.11 | 1.22 ± 0.14  | 2.61 ± 0.64              |
| WAB2_DH (8)         | 24.0 ± 1.0 | 81.70 ± 5.94  | 10.05 ± 0.54                 | 6.34 ± 0.48                  | 20.66 ± 0.87                 | 17.80 ± 0.89                 | 6.82 ± 0.17         | 6.29 ± 0.18         | 36.89 ± 4.10 | 43.93 ± 3.07 | 22.16 ± 3.12       | 50.37 ± 5.15     | 28.22 ± 2.99     | 0.87 ± 0.06 | 1.18 ± 0.08  | 1.76 ± 0.45              |
| YOX_DE (6)          | 26.4 ± 1.3 | 78.64 ± 4.63  | 12.91 ± 0.62                 | 8.18 ± 0.55                  | 23.09 ± 0.56                 | 19.83 ± 0.69                 | 6.79 ± 0.19         | 6.14 ± 0.18         | 36.73 ± 1.96 | 44.23 ± 3.11 | 29.19 ± 2.60       | 65.94 ± 2.58     | 36.76 ± 2.26     | 0.67 ± 0.04 | 0.94 ± 0.06  | 2.92 ± 0.39              |

\* Data is presented as mean value ± standard deviation (SD). Number of biological replicates is indicated in brackets next to the strain name. Parameter definitions are provided below in “Ultrasound measurements and calculations” section.

**Table S2 Summary of morphological and functional parameters of selected CC strains based on echocardiographic images  
16-week-old male mice one month after MI**

| Strain / Parameter*       | BWT (g)     | AreaDist;d (mm <sup>2</sup> ) | AreaDist;s (mm <sup>2</sup> ) | AreaMid;d (mm <sup>2</sup> ) | AreaMid;s (mm <sup>2</sup> ) | AreaProx;d (mm <sup>2</sup> ) | AreaProx;s (mm <sup>2</sup> ) | Heart Length;d (mm) | Heart Length;s (mm) | EF (%)        | LV Volume;d (μL) | LV Volume;s (μL) | Stroke Volume (μL) | PA Peak Pressure (mm Hg) | LVD (%)         | DEF (%)       |
|---------------------------|-------------|-------------------------------|-------------------------------|------------------------------|------------------------------|-------------------------------|-------------------------------|---------------------|---------------------|---------------|------------------|------------------|--------------------|--------------------------|-----------------|---------------|
| <b>129x1/SvJArc (3)</b>   | 31.3 ± 0.5  | 26.84 ± 5.81                  | 24.76 ± 5.57                  | 24.04 ± 4.13                 | 21.03 ± 5.08                 | 17.92 ± 1.22                  | 13.57 ± 1.98                  | 8.77 ± 0.89         | 8.15 ± 0.90         | 20.73 ± 6.98  | 188.38 ± 53.11   | 153.07 ± 53.99   | 35.31 ± 3.43       | 1.95 ± 0.70              | 175.23 ± 75.32  | 60.12 ± 8.90  |
| <b>A/Jarc (8)</b>         | 26.4 ± 1.4  | 17.54 ± 4.74                  | 16.13 ± 4.91                  | 17.47 ± 4.67                 | 14.38 ± 4.85                 | 15.65 ± 3.15                  | 10.80 ± 3.03                  | 7.20 ± 0.47         | 6.75 ± 0.51         | 24.55 ± 5.99  | 112.73 ± 31.78   | 86.48 ± 29.46    | 26.25 ± 3.74       | 1.93 ± 0.28              | 134.05 ± 57.14  | 54.08 ± 9.27  |
| <b>C57BL/6JArc (5)</b>    | 28.2 ± 2.2  | 30.16 ± 5.30                  | 27.69 ± 4.78                  | 30.22 ± 3.09                 | 27.66 ± 3.04                 | 25.93 ± 3.10                  | 21.10 ± 2.65                  | 8.10 ± 0.31         | 7.84 ± 0.39         | 14.34 ± 2.05  | 218.14 ± 33.60   | 186.87 ± 29.24   | 31.27 ± 6.84       | 1.59 ± 0.57              | 225.01 ± 50.18  | 70.17 ± 6.77  |
| <b>NOD/ShiLtJArc (6)</b>  | 28.8 ± 1.0  | 14.51 ± 3.51                  | 12.70 ± 4.15                  | 18.20 ± 4.10                 | 14.66 ± 4.78                 | 18.04 ± 2.86                  | 12.35 ± 3.31                  | 7.72 ± 0.16         | 7.31 ± 0.25         | 27.50 ± 8.81  | 116.59 ± 21.35   | 86.08 ± 24.88    | 30.51 ± 4.91       | 2.26 ± 0.49              | 112.31 ± 43.62  | 51.99 ± 16.80 |
| <b>BEM_AG (4)</b>         | 35.1 ± 5.0  | 11.71 ± 1.94                  | 9.34 ± 2.18                   | 15.35 ± 1.46                 | 11.93 ± 1.48                 | 14.41 ± 1.34                  | 9.99 ± 1.83                   | 6.94 ± 0.12         | 6.40 ± 0.21         | 30.51 ± 6.29  | 85.08 ± 10.04    | 59.37 ± 10.58    | 25.72 ± 3.99       | 1.76 ± 0.47              | 75.30 ± 39.27   | 42.2 ± 19.63  |
| <b>BOM_GB (12)</b>        | 24.4 ± 1.5  | 13.39 ± 3.95                  | 11.10 ± 4.02                  | 15.34 ± 3.20                 | 11.96 ± 3.26                 | 15.80 ± 2.96                  | 10.75 ± 2.97                  | 6.54 ± 0.41         | 6.03 ± 0.48         | 31.28 ± 9.41  | 86.48 ± 21.56    | 60.84 ± 21.13    | 25.64 ± 4.25       | 2.05 ± 0.72              | 48.37 ± 27.10   | 34.96 ± 16.92 |
| <b>BOON_HF (4)</b>        | 31.4 ± 5.1  | 28.58 ± 8.70                  | 25.60 ± 9.83                  | 29.17 ± 13.01                | 27.01 ± 14.49                | 20.44 ± 4.30                  | 16.55 ± 5.99                  | 8.37 ± 0.63         | 7.98 ± 0.36         | 17.95 ± 8.55  | 195.62 ± 86.27   | 165.26 ± 86.10   | 30.36 ± 4.88       | 1.88 ± 0.94              | 190.4 ± 123.11  | 64.13 ± 14.55 |
| <b>DAVIS_BA (3)</b>       | 25.6 ± 0.14 | 27.92 ± 8.35                  | 26.87 ± 8.39                  | 30.63 ± 8.81                 | 27.84 ± 10.20                | 25.50 ± 4.61                  | 20.63 ± 4.68                  | 8.00 ± 0.66         | 7.68 ± 0.92         | 14.62 ± 7.42  | 215.61 ± 74.38   | 186.86 ± 79.52   | 28.75 ± 5.14       | 3.09 ± 1.65              | 206.45 ± 103.76 | 68.16 ± 16.26 |
| <b>DOD_AH (6)</b>         | 30.7 ± 2.7  | 17.89 ± 4.17                  | 16.15 ± 4.53                  | 18.67 ± 3.50                 | 15.71 ± 3.35                 | 16.68 ± 2.31                  | 12.31 ± 1.70                  | 7.95 ± 0.57         | 7.54 ± 0.38         | 21.48 ± 2.47  | 132.22 ± 32.44   | 104.02 ± 26.67   | 28.20 ± 6.67       | 1.76 ± 0.41              | 116.12 ± 55.65  | 58.76 ± 5.14  |
| <b>DONNELL_HA (5)</b>     | 26.8 ± 2.6  | 10.90 ± 4.09                  | 9.63 ± 4.92                   | 12.71 ± 4.19                 | 10.38 ± 4.19                 | 11.82 ± 2.62                  | 8.30 ± 2.03                   | 6.68 ± 0.54         | 6.23 ± 0.61         | 26.62 ± 10.75 | 76.44 ± 29.75    | 57.95 ± 29.04    | 18.49 ± 4.21       | 1.03 ± 0.45              | 70.35 ± 58.89   | 40.79 ± 20.39 |
| <b>FEW_FD (5)</b>         | 25.0 ± 2.7  | 21.02 ± 3.41                  | 19.39 ± 3.37                  | 21.08 ± 3.11                 | 18.07 ± 3.65                 | 18.73 ± 3.14                  | 13.81 ± 3.67                  | 8.03 ± 0.47         | 7.24 ± 0.58         | 24.21 ± 6.32  | 151.10 ± 24.33   | 115.65 ± 27.67   | 35.45 ± 4.64       | 2.55 ± 1.11              | 145.81 ± 63.82  | 54.50 ± 15.74 |
| <b>FIM_DF (4)</b>         | 23.5 ± 2.0  | 9.62 ± 0.77                   | 7.30 ± 1.58                   | 12.31 ± 1.71                 | 8.91 ± 2.20                  | 13.42 ± 0.75                  | 8.60 ± 1.52                   | 6.86 ± 0.19         | 6.31 ± 0.23         | 35.79 ± 10.84 | 74.07 ± 5.31     | 47.37 ± 6.80     | 26.70 ± 9.14       | 2.63 ± 1.36              | 35.66 ± 19.76   | 28.84 ± 19.87 |
| <b>FIV_AC (6)</b>         | 26.1 ± 1.8  | 12.47 ± 5.66                  | 10.28 ± 5.58                  | 12.96 ± 3.98                 | 9.55 ± 4.24                  | 12.94 ± 1.73                  | 8.10 ± 1.85                   | 7.25 ± 0.62         | 6.80 ± 0.59         | 32.74 ± 9.01  | 82.86 ± 24.25    | 57.18 ± 23.13    | 25.68 ± 3.93       | 1.64 ± 0.29              | 84.44 ± 42.59   | 50.56 ± 13.49 |
| <b>GALASUPREME_CE (3)</b> | 20.8 ± 2.7  | 28.00 ± 10.26                 | 25.78 ± 11.95                 | 22.63 ± 6.73                 | 20.15 ± 9.12                 | 19.12 ± 3.97                  | 13.99 ± 3.84                  | 8.71 ± 0.99         | 8.38 ± 1.14         | 19.35 ± 13.64 | 199.08 ± 78.37   | 167.26 ± 85.65   | 31.82 ± 8.20       | 1.86 ± 0.75              | 301.54 ± 186.79 | 54.31 ± 31.02 |
| <b>GIG_EF (3)</b>         | 27.6 ± 2.3  | 13.98 ± 3.78                  | 12.29 ± 4.19                  | 13.86 ± 2.78                 | 10.67 ± 3.48                 | 14.33 ± 1.18                  | 8.51 ± 1.15                   | 7.27 ± 0.36         | 6.79 ± 0.62         | 30.75 ± 5.51  | 96.42 ± 14.56    | 67.25 ± 15.03    | 29.17 ± 1.54       | 2.96 ± 1.00              | 61.91 ± 16.42   | 42.27 ± 9.42  |
| <b>GIT_GC (3)</b>         | 33.0 ± 1.5  | 14.80 ± 0.83                  | 13.14 ± 1.74                  | 18.05 ± 3.24                 | 15.08 ± 3.25                 | 18.01 ± 1.59                  | 12.29 ± 1.15                  | 7.21 ± 0.32         | 6.81 ± 0.12         | 25.19 ± 3.19  | 113.04 ± 6.52    | 84.70 ± 8.00     | 28.35 ± 2.50       | 3.40 ± 0.94              | 79.23 ± 37.83   | 21.30 ± 14.98 |
| <b>HAZ_EF (3)</b>         | 19.8 ± 1.2  | 15.59 ± 0.83                  | 12.91 ± 1.83                  | 18.07 ± 1.28                 | 14.15 ± 1.65                 | 18.48 ± 1.85                  | 12.33 ± 1.92                  | 7.51 ± 0.02         | 6.71 ± 0.27         | 32.41 ± 8.18  | 113.67 ± 6.80    | 76.87 ± 10.79    | 36.80 ± 8.85       | 3.27 ± 0.60              | 76.39 ± 14.86   | 35.69 ± 14.52 |
| <b>JUNIOR_GB (3)</b>      | 24.8 ± 3.2  | 10.25 ± 0.83                  | 8.42 ± 3.11                   | 13.11 ± 4.21                 | 10.56 ± 3.40                 | 13.58 ± 1.83                  | 9.50 ± 1.36                   | 7.38 ± 0.09         | 7.07 ± 0.07         | 25.94 ± 3.94  | 87.37 ± 27.82    | 64.32 ± 18.97    | 23.05 ± 9.84       | 1.58 ± 0.30              | 57.63 ± 29.20   | 43.13 ± 16.38 |
| <b>LUZ_FH (4)</b>         | 23.2 ± 0.5  | 18.65 ± 4.07                  | 17.45 ± 4.53                  | 19.22 ± 2.07                 | 15.70 ± 2.20                 | 17.40 ± 1.68                  | 12.22 ± 1.49                  | 7.08 ± 0.27         | 6.57 ± 0.27         | 23.74 ± 4.07  | 113.78 ± 12.21   | 86.87 ± 12.22    | 26.91 ± 4.77       | 2.00 ± 0.35              | 134.04 ± 23.99  | 44.86 ± 7.33  |
| <b>NUK_AC (5)</b>         | 27.3 ± 4.1  | 12.87 ± 2.11                  | 10.03 ± 2.66                  | 15.37 ± 2.38                 | 11.12 ± 2.55                 | 14.94 ± 2.04                  | 10.24 ± 1.81                  | 7.12 ± 0.61         | 6.56 ± 0.58         | 35.15 ± 4.06  | 91.07 ± 14.44    | 66.77 ± 20.80    | 31.95 ± 6.80       | 2.42 ± 1.59              | 58.89 ± 33.18   | 22.02 ± 2.14  |
| <b>PAT_CD (3)</b>         | 32.1 ± 4.1  | 15.73 ± 8.84                  | 14.80 ± 8.60                  | 18.76 ± 4.07                 | 15.90 ± 2.42                 | 16.97 ± 3.99                  | 11.13 ± 1.93                  | 7.65 ± 1.19         | 7.06 ± 1.03         | 24.25 ± 4.10  | 123.99 ± 50.22   | 92.73 ± 35.00    | 31.26 ± 15.61      | 2.41 ± 0.52              | 81.38 ± 68.42   | 48.17 ± 0.89  |
| <b>PEF_EC (6)</b>         | 27.2 ± 1.0  | 12.99 ± 4.07                  | 11.21 ± 4.17                  | 16.02 ± 3.69                 | 11.82 ± 3.64                 | 17.63 ± 3.46                  | 10.57 ± 2.75                  | 7.50 ± 0.42         | 7.02 ± 0.37         | 32.91 ± 8.81  | 102.85 ± 26.97   | 69.65 ± 22.75    | 33.19 ± 9.68       | 2.31 ± 0.42              | 41.61 ± 32.77   | 28.48 ± 18.97 |
| <b>POH_DC (3)</b>         | 32.1 ± 2.4  | 8.01 ± 0.87                   | 5.28 ± 0.71                   | 10.97 ± 0.80                 | 7.52 ± 0.33                  | 11.77 ± 0.81                  | 6.84 ± 0.35                   | 6.05 ± 0.19         | 5.67 ± 0.15         | 40.24 ± 2.37  | 53.97 ± 6.71     | 32.23 ± 3.52     | 21.74 ± 3.58       | 1.64 ± 0.37              | 22.44 ± 17.68   | 31.18 ± 3.50  |
| <b>SAT_GA (5)</b>         | 24.5 ± 2.5  | 10.47 ± 2.34                  | 9.33 ± 2.66                   | 12.31 ± 2.44                 | 9.91 ± 2.65                  | 12.95 ± 2.18                  | 8.50 ± 1.42                   | 6.35 ± 0.57         | 6.01 ± 0.61         | 28.73 ± 5.73  | 60.20 ± 10.62    | 49.34 ± 13.88    | 17.47 ± 3.21       | 2.34 ± 1.47              | 61.47 ± 34.68   | 37.75 ± 17.11 |
| <b>TOFU_FB (10)</b>       | 19.8 ± 1.5  | 20.66 ± 2.44                  | 19.63 ± 2.78                  | 18.95 ± 2.85                 | 17.53 ± 2.98                 | 17.82 ± 1.95                  | 12.98 ± 2.22                  | 7.59 ± 0.35         | 7.28 ± 0.20         | 16.05 ± 5.12  | 134.51 ± 19.60   | 112.66 ± 16.38   | 21.85 ± 8.04       | 1.53 ± 0.39              | 217.55 ± 41.76  | 56.47 ± 17.69 |
| <b>TOP_DA (4)</b>         | 27.5 ± 0.9  | 15.03 ± 6.30                  | 12.71 ± 6.39                  | 16.37 ± 4.19                 | 13.78 ± 5.09                 | 13.75 ± 5.25                  | 9.58 ± 4.71                   | 7.23 ± 0.68         | 6.77 ± 0.75         | 26.68 ± 8.31  | 99.07 ± 42.10    | 75.03 ± 41.26    | 24.04 ± 5.12       | n/a**                    | 112.18 ± 81.45  | 45.80 ± 16.95 |
| <b>WAB2_DH (3)</b>        | 25.9 ± 2.2  | 14.42 ± 0.96                  | 11.86 ± 1.07                  | 18.13 ± 1.92                 | 14.50 ± 2.42                 | 17.30 ± 0.34                  | 13.66 ± 1.95                  | 7.28 ± 0.63         | 6.70 ± 0.64         | 25.96 ± 4.85  | 106.03 ± 11.25   | 78.52 ± 10.56    | 27.51 ± 5.14       | 2.21 ± 0.39              | 65.00 ± 23.99   | 44.52 ± 13.30 |

\* Data is presented as mean value ± standard deviation (SD). Number of biological replicates is indicated in brackets next to the strain name.

Parameter definitions are provided below in “Ultrasound measurements and calculations” section.

\*\* Not assessed

# Ultrasound Measurement and Calculation definitions

Vevo2100 (FUJIFILM/VisualSonics)

## Measurement definitions

| Label                | Description                                | Units           | Generic type | Mode   |
|----------------------|--------------------------------------------|-----------------|--------------|--------|
| Endocardial Area; d  | Endocardial area in diastole               | mm <sup>2</sup> | Area         | B-Mode |
| Endocardial Major; d | Endocardial major in diastole              | mm              | Length       | B-Mode |
| Endocardial Area; s  | Endocardial area in systole                | mm <sup>2</sup> | Area         | B-Mode |
| Endocardial Major; s | Endocardial major in systole               | mm              | Length       | B-Mode |
| Epicardial Area; d   | Epicardial area in diastole                | mm <sup>2</sup> | Area         | B-Mode |
| Epicardial Major; d  | Epicardial major in diastole               | mm              | Length       | B-Mode |
| Epicardial Area; s   | Epicardial area in systole                 | mm <sup>2</sup> | Area         | B-Mode |
| Epicardial Major; s  | Epicardial major in systole                | mm              | Length       | B-Mode |
| LVPW;d               | Left ventricular posterior wall (diastole) | mm              | Depth        | M-Mode |
| LVPW;s               | Left ventricular posterior wall (systole)  | mm              | Depth        | M-Mode |

## Calculations

| Name                           | Description                              | Units | Formula                                                                                                                                                |
|--------------------------------|------------------------------------------|-------|--------------------------------------------------------------------------------------------------------------------------------------------------------|
| Endocardial Volume; d          | Endocardial volume in diastole           | μL    | $\frac{4\pi}{2} \times \frac{End\ Major; d}{2} \times \left( \frac{End\ Area; d}{\pi \left( \frac{End\ Area; d}{2} \right)} \right)^2$                 |
| Endocardial Volume; s          | Endocardial volume in systole            | μL    | $\frac{4\pi}{2} \times \frac{End\ Major; s}{2} \times \left( \frac{End\ Area; s}{\pi \left( \frac{End\ Area; s}{2} \right)} \right)^2$                 |
| Endocardial Stroke Volume (SV) | Stroke volume (SV)                       | μL    | <i>Endocardial Volume; d - Endocardial Volume; s</i>                                                                                                   |
| Endocardial %EF                | Percent ejection fraction                | %     | $\frac{Endocardial\ SV}{Endocardial\ Vol; d} \times 100$                                                                                               |
| Endocardial %FAC               | Percent fractional area change           | %     | $\frac{Endocardial\ area; d - Endocardial\ area; s}{Endocardial\ area; d} \times 100$                                                                  |
| LV Mass                        | LV Mass                                  | mg    | $1.05 \times (5/6 \times Epicardial\ Area; d \times (Epicardial\ Major; d + T; d)) - (5/6 \times Endocardial\ Area; d \times (Endocardial\ Major; d))$ |
| Simp Volume; d                 | Simpson's volume calculation in diastole | μL    | $(AreaProx; d + AreaMid; d) \times h + AreaDist; d \times \frac{h}{2} + \frac{\pi}{6} \times h^3$<br>h = Simpson Length in diastole                    |
| Simp Volume; s                 | Simpson's volume calculation in systole  | μL    | $(AreaProx; s + AreaMid; s) \times h + AreaDist; s \times \frac{h}{2} + \frac{\pi}{6} \times h^3$<br>h = Simpson Length in diastole                    |
| Simp SV                        | Stroke volume                            | μL    | <i>Simp Volume; d - Simp Volume; s</i>                                                                                                                 |
| Simp %EF                       | Ejection fraction                        | %     | $100 * Simp\ SV / Simp\ Volume; d$                                                                                                                     |

## Supplementary Table S3

### GeneNetwork/WebQTL correlation analysis of cardiac gene expression vs LVSD/HF-related traits

|    | Record ID    | Gene Symbol       | Description                                                                      | Mean Expression | LVD         |          | D%EF        |          |
|----|--------------|-------------------|----------------------------------------------------------------------------------|-----------------|-------------|----------|-------------|----------|
|    |              |                   |                                                                                  |                 | Correlation | p-Value  | Correlation | p-Value  |
| 1  | ILMN_2856568 | <b>Gppb1</b>      | Mus musculus GC-rich promoter binding protein 1                                  | 9.063           | 0.897       | 1.22E-05 | 0.888       | 2.29E-05 |
| 2  | ILMN_1219002 | <b>Usmg5</b>      | Upregulated during skeletal muscle growth 5                                      | 8.049           | 0.924       | 1.21E-06 | 0.857       | 1.20E-04 |
| 3  | ILMN_2712634 | <b>Nab1</b>       | Mus musculus Ngfi-A binding protein 1                                            | 7.026           | -0.843      | 2.20E-04 | -0.901      | 9.26E-06 |
| 4  | ILMN_2924601 | <b>Klhl17</b>     | Mus musculus kelch-like 17 (Drosophila)                                          | 8.672           | -0.891      | 1.92E-05 | -0.815      | 6.20E-04 |
| 5  | ILMN_1254837 | <b>Rab7</b>       | Mus musculus RAB7, member RAS oncogene family                                    | 7.031           | -0.857      | 1.20E-04 | -0.844      | 2.10E-04 |
| 6  | ILMN_1250201 | <b>Fndc10</b>     | Fibronectin type III domain containing 10 (B930041F14Rik)                        | 7.574           | -0.817      | 5.90E-04 | -0.938      | 2.44E-07 |
| 7  | ILMN_3163159 | <b>Gng5</b>       | Mus musculus guanine nucleotide binding protein (G protein), gamma 5 subunit     | 7.813           | 0.858       | 1.20E-04 | 0.815       | 6.20E-04 |
| 8  | ILMN_2748205 | <b>Hspb3</b>      | Mus musculus heat shock protein 3                                                | 8.589           | 0.843       | 2.20E-04 | 0.813       | 6.60E-04 |
| 9  | ILMN_2724570 | <b>Mapk12</b>     | Mus musculus mitogen-activated protein kinase 12                                 | 8.106           | -0.816      | 6.10E-04 | -0.875      | 4.96E-05 |
| 10 | ILMN_2821501 | <b>Zfand6</b>     | Mus musculus zinc finger, AN1-type domain 6                                      | 7.536           | 0.859       | 1.10E-04 | 0.803       | 8.90E-04 |
| 11 | ILMN_1227012 | <b>Ndufb4</b>     | Mus musculus NADH dehydrogenase (ubiquinone) 1 beta subcomplex 4                 | 8.2             | 0.837       | 2.80E-04 | 0.815       | 6.10E-04 |
| 12 | ILMN_1235230 | <b>Pdlim3</b>     | Mus musculus PDZ and LIM domain 3                                                | 8.734           | -0.842      | 2.30E-04 | -0.806      | 8.10E-04 |
| 13 | ILMN_3144289 | <b>Traf3</b>      | Mus musculus Tnf receptor-associated factor 3                                    | 8.463           | 0.832       | 3.40E-04 | -0.821      | 5.00E-04 |
| 14 | ILMN_2776899 | <b>Atp5k</b>      | ATP synthase, H <sup>+</sup> transporting, mitochondrial F1F0 complex, subunit E | 7.113           | 0.860       | 1.10E-04 | 0.795       | 1.13E-03 |
| 15 | ILMN_2670230 | <b>Tbrg4</b>      | Mus musculus transforming growth factor beta regulated gene 4                    | 7.428           | -0.884      | 2.87E-05 | -0.787      | 1.43E-03 |
| 16 | ILMN_2723881 | <b>Hcfc1</b>      | Host cell factor C1                                                              | 8.766           | 0.804       | 8.70E-04 | 0.832       | 3.40E-04 |
| 17 | ILMN_2756008 | <b>Nasp</b>       | Nuclear autoantigenic sperm protein (histone-binding)                            | 7.439           | -0.864      | 8.65E-05 | -0.786      | 1.47E-03 |
| 18 | ILMN_3133522 | <b>Ppm1d</b>      | Mus musculus protein phosphatase 1D magnesium-dependent, delta isoform           | 8.126           | -0.841      | 2.40E-04 | -0.802      | 9.40E-04 |
| 19 | ILMN_2671689 | <b>Cox7b</b>      | Cytochrome c oxidase subunit VIIb                                                | 8.63            | 0.819       | 5.30E-04 | 0.810       | 7.30E-04 |
| 20 | ILMN_2718416 | <b>Eif3k</b>      | Mus musculus eukaryotic translation initiation factor 3                          | 9.583           | 0.794       | 1.17E-03 | 0.824       | 4.50E-04 |
| 21 | ILMN_2680262 | <b>Polr2g</b>     | Mus musculus polymerase (RNA) II (DNA directed) polypeptide G                    | 9.393           | 0.831       | 3.50E-04 | 0.786       | 1.44E-03 |
| 22 | ILMN_1242391 | <b>Tmem8</b>      | Mus musculus transmembrane protein 8 (five membrane-spanning domains)            | 7.027           | 0.793       | 1.19E-03 | 0.805       | 8.60E-04 |
| 23 | ILMN_2684279 | <b>Edem2</b>      | ER degradation enhancer, mannosidase alpha-like 2 (9530090G24Rik)                | 8.636           | -0.801      | 9.50E-04 | -0.792      | 1.23E-03 |
| 24 | ILMN_2896492 | <b>Jmjd8</b>      | Jumonji domain containing 8 (2610003J06Rik)                                      | 8.918           | -0.777      | 1.84E-03 | -0.821      | 5.00E-04 |
| 25 | ILMN_2868981 | <b>Ehbp1</b>      | Mus musculus EH domain binding protein 1                                         | 8.526           | 0.827       | 4.10E-04 | 0.764       | 2.57E-03 |
| 26 | ILMN_2972645 | <b>Pdzd11</b>     | Mus musculus PDZ domain containing 11                                            | 8.285           | -0.765      | 2.49E-03 | -0.854      | 1.40E-04 |
| 27 | ILMN_2655429 | <b>C530015C18</b> | Hypothetical protein C530015C18                                                  | 7.95            | -0.838      | 2.70E-04 | -0.748      | 3.68E-03 |
| 28 | ILMN_2966826 | <b>Ttl1</b>       | Mus musculus tubulin tyrosine ligase-like 1                                      | 9.286           | 0.787       | 1.41E-03 | 0.783       | 1.56E-03 |
| 29 | ILMN_1257503 | <b>Tm9sf2</b>     | Mus musculus transmembrane 9 superfamily member 2                                | 7.024           | 0.786       | 1.45E-03 | 0.777       | 1.87E-03 |
| 30 | ILMN_2698606 | <b>Tmed4</b>      | Transmembrane p24 trafficking protein 4 (1110014L17Rik)                          | 8.147           | -0.779      | 1.78E-03 | -0.786      | 1.46E-03 |
| 31 | ILMN_1221702 | <b>Plaa</b>       | phospholipase A2, activating protein                                             | 9.027           | 0.803       | 9.00E-04 | 0.755       | 3.14E-03 |
| 32 | ILMN_2692615 | <b>Tgm2</b>       | Transglutaminase 2, C polypeptide                                                | 11.845          | -0.763      | 2.59E-03 | -0.802      | 9.30E-04 |
| 33 | ILMN_2687032 | <b>Fbxo31</b>     | Mus musculus F-box protein 31                                                    | 8.462           | -0.784      | 1.54E-03 | -0.761      | 2.72E-03 |
| 34 | ILMN_2591917 | <b>Akr1b3</b>     | Aldo-keto reductase family 1, member B3 (aldose reductase)                       | 9.977           | 0.828       | 3.90E-04 | 0.7179      | 6.73E-03 |
| 35 | ILMN_1215862 | <b>Cxcl9</b>      | Chemokine (C-X-C motif) ligand 9                                                 | 7.752           | 0.771       | 2.16E-03 | 0.771       | 2.14E-03 |
| 36 | ILMN_1223614 | <b>Rbpms</b>      | RNA binding protein gene with multiple splicing                                  | 10.15           | -0.769      | 2.27E-03 | -0.773      | 2.05E-03 |
| 37 | ILMN_2771219 | <b>Pdlim5</b>     | PDZ and LIM domain 5 (1110001A05Rik)                                             | 11.826          | -0.785      | 1.51E-03 | -0.757      | 3.00E-03 |
| 38 | ILMN_2666406 | <b>Prrc1</b>      | proline-rich coiled-coil 1 (1190002C06Rik)                                       | 9.173           | -0.788      | 1.37E-03 | -0.748      | 3.69E-03 |
| 39 | ILMN_2605004 | <b>Ndufb9</b>     | Mus musculus NADH dehydrogenase (ubiquinone) 1 beta subcomplex, 9                | 11.241          | 0.768       | 2.34E-03 | 0.768       | 2.33E-03 |
| 40 | ILMN_3126933 | <b>Tacc1</b>      | Mus musculus transforming, acidic coiled-coil containing protein 1               | 8.472           | -0.754      | 3.23E-03 | -0.796      | 1.12E-03 |
| 41 | ILMN_1249116 | <b>Cpsf3l</b>     | Mus musculus cleavage and polyadenylation specific factor 3-like                 | 7.78            | -0.762      | 2.71E-03 | -0.760      | 2.81E-03 |
| 42 | ILMN_2702197 | <b>Pcbp1</b>      | Poly(rC) binding protein 1                                                       | 10.336          | -0.781      | 1.69E-03 | -0.731      | 5.19E-03 |
| 43 | ILMN_1230271 | <b>Anp32a</b>     | Mus musculus acidic (leucine-rich) nuclear phosphoprotein 32 family, member A    | 7.812           | 0.774       | 1.99E-03 | 0.744       | 4.00E-03 |
| 44 | ILMN_1252302 | <b>Taf6</b>       | TAF6 RNA polymerase II, TATA box binding protein (TBP)-associated factor         | 7.257           | 0.759       | 2.87E-03 | 0.762       | 2.65E-03 |
| 45 | ILMN_2510364 | <b>Trip12</b>     | Thyroid hormone receptor interactor 12                                           | 7.455           | 0.805       | 8.50E-04 | 0.705       | 8.50E-03 |
| 46 | ILMN_2928573 | <b>Rev1</b>       | Mus musculus REV1 homolog (S. cerevisiae)                                        | 7.205           | -0.747      | 3.75E-03 | -0.795      | 1.13E-03 |
| 47 | ILMN_2973097 | <b>Coq3</b>       | Mus musculus coenzyme Q3 homolog, methyltransferase (yeast)                      | 7.495           | 0.774       | 2.02E-03 | 0.742       | 4.17E-03 |
| 48 | ILMN_2859978 | <b>Papss1</b>     | Mus musculus 3'-phosphoadenosine 5'-phosphosulfate synthase 1                    | 8.581           | -0.761      | 2.73E-03 | -0.758      | 2.91E-03 |
| 49 | ILMN_2883952 | <b>YdjC</b>       | YdjC homolog (bacterial) (1810015A11Rik)                                         | 7.148           | -0.756      | 3.08E-03 | -0.761      | 2.71E-03 |
| 50 | ILMN_3008361 | <b>Bmper</b>      | Mus musculus BMP-binding endothelial regulator                                   | 7.414           | -0.744      | 4.01E-03 | -0.785      | 1.49E-03 |

The 50 top correlates common for the LVD and  $\Delta$ EF traits (correlation coefficient  $\geq 0.74$ ) for normalized gene expression level  $> 7$ .

P-value provided according to Pearson's product-moment correlations.

**Table S4 List of functional SNPs corresponding to the QTL located on Chromosome 12 associated with the myocardial rupture trait**

| Gene          | dbSNP       | Genomic Location | Ref | 129S1/<br>SvlmJ | A/J | C57BL/<br>6NJ | CAST/EiJ | NOD/<br>ShiLtJ | NZO/<br>HILtJ | PWK/PhJ | WSB/EiJ | Consequence Type      | Amino acids | Protein position | Impact   | SIFT             |
|---------------|-------------|------------------|-----|-----------------|-----|---------------|----------|----------------|---------------|---------|---------|-----------------------|-------------|------------------|----------|------------------|
| <b>Nrxn3</b>  | rs231902337 | 12:90283564      | G   | -               | -   | -             | -        | -              | -             | A       | -       | Splice region variant |             |                  | low      |                  |
| <b>Cep128</b> | rs227456595 | 12:91159065      | C   | -               | -   | -             | G        | -              | -             | G       | -       | Splice donor variant  |             |                  | high     |                  |
| <b>Cep128</b> | rs249098074 | 12:91183657      | G   | -               | -   | -             | -        | -              | -             | T       | -       | Splice region variant |             |                  | low      |                  |
| <b>Cep128</b> | rs261503899 | 12:91213702      | C   | -               | -   | -             | -        | -              | -             | T       | -       | Missense variant      | S/N         | 889              | moderate | tolerated (0.57) |
| <b>Cep128</b> | rs48798187  | 12:91213755      | A   | -               | -   | -             | -        | -              | -             | G       | -       | Splice region variant |             |                  | low      |                  |
| <b>Cep128</b> | rs48026157  | 12:91234161      | A   | -               | -   | -             | C        | -              | -             | C       | -       | Missense variant      | H/Q         | 811              | moderate | tolerated (1)    |
| <b>Cep128</b> | rs46662645  | 12:91255722      | A   | -               | -   | -             | -        | -              | -             | T       | -       | Missense variant      | D/E         | 742              | moderate | tolerated (0.43) |
| <b>Cep128</b> | rs261762568 | 12:91260124      | G   | -               | -   | -             | T        | -              | -             | -       | -       | Missense variant      | D/E         | 690              | moderate | tolerated (0.5)  |
| <b>Cep128</b> | rs51557552  | 12:91260575      | T   | -               | -   | -             | C        | -              | -             | C       | -       | Missense variant      | N/S         | 540              | moderate | tolerated (0.52) |
| <b>Cep128</b> | rs46446778  | 12:91266888      | T   | -               | -   | -             | C        | -              | -             | C       | -       | Missense variant      | T/A         | 469              | moderate | tolerated (1)    |
| <b>Cep128</b> | rs262007891 | 12:91294082      | G   | -               | -   | -             | -        | -              | -             | C       | -       | Missense variant      | P/A         | 336              | moderate | tolerated (0.08) |
| <b>Cep128</b> | rs46978148  | 12:91294173      | T   | -               | -   | -             | C        | -              | -             | C       | -       | Splice region variant |             |                  | low      |                  |
| <b>Cep128</b> | rs252980304 | 12:91299035      | C   | -               | -   | -             | T        | -              | -             | T       | -       | Missense variant      | V/I         | 268              | moderate | tolerated (0.32) |
| <b>Cep128</b> | rs217950132 | 12:91320001      | T   | -               | -   | -             | G        | -              | -             | G       | -       | Splice region variant |             |                  | low      |                  |
| <b>Cep128</b> | rs266165675 | 12:91366444      | C   | -               | -   | -             | -        | -              | -             | T       | -       | Missense variant      | G/R         | 16               | moderate | tolerated (0.92) |
| <b>Cep128</b> | rs49587405  | 12:91370201      | G   | -               | -   | -             | A        | -              | -             | A       | -       | Splice region variant |             |                  | low      |                  |

**Table S5 List of functional SNPs corresponding to the QTL located on Chromosome 5 associated with the LVD trait**

| Gene          | dbSNP       | Genomic Location | Ref | 129S1/SvlmJ | A/J | C57BL/6NJ | CAST/EiJ | NOD/ShiLtJ | NZO/HILtJ | PWK/PhJ | WSB/EiJ | Consequence Type      | Amino acids | Protein position | Impact   | SIFT                |
|---------------|-------------|------------------|-----|-------------|-----|-----------|----------|------------|-----------|---------|---------|-----------------------|-------------|------------------|----------|---------------------|
| <b>Tfip11</b> | rs32109670  | 5:112333231      | G   | -           | -   | -         | A        | -          | -         | -       | -       | Missense variant      | E/K         | 358              | moderate | tolerated (0.39)    |
| <b>Tfip11</b> | rs33218387  | 5:112333336      | G   | -           | -   | -         | -        | -          | A         | -       | A       | Missense variant      | A/T         | 393              | moderate | tolerated (0.63)    |
| <b>Srrd</b>   | rs234879464 | 5:112339730      | T   | -           | -   | -         | G        | -          | -         | -       | -       | Missense variant      | S/R         | 169              | moderate | tolerated (0.21)    |
| <b>Gm6583</b> | rs32113318  | 5:112354764      | C   | -           | -   | -         | T        | -          | -         | -       | -       | Missense variant      | C/T         | 358              | moderate | tolerated (0.51)    |
| <b>Gm6583</b> | rs264081076 | 5:112355358      | T   | -           | -   | -         | C        | -          | -         | C       | -       | Missense variant      | K/R         | 160              | moderate | tolerated (0.8)     |
| <b>Gm6583</b> | rs32113322  | 5:112355547      | G   | -           | -   | -         | A        | -          | -         | -       | -       | Missense variant      | A/V         | 97               | moderate | tolerated (0.88)    |
| <b>Gm6583</b> | rs258837611 | 5:112355749      | C   | -           | -   | -         | T        | -          | -         | -       | -       | Missense variant      | G/R         | 30               | moderate | tolerated (0.97)    |
| <b>Hps4</b>   | rs253490750 | 5:112349378      | C   | -           | -   | -         | -        | -          | -         | -       | T       | Missense variant      | R/C         | 76               | moderate | tolerated(0.05)     |
| <b>Hps4</b>   | rs239835610 | 5:112368976      | C   | -           | -   | -         | T        | -          | -         | -       | -       | Splice region variant | -           | -                | low      |                     |
| <b>Hps4</b>   | rs32107636  | 5:112370143      | G   | -           | -   | -         | A        | -          | -         | -       | -       | Missense variant      | C/Y         | 334              | moderate | tolerated (0.16)    |
| <b>Hps4</b>   | rs228327059 | 5:112374979      | C   | -           | -   | -         | -        | -          | -         | -       | T       | Missense variant      | L/F         | 568              | moderate | deleterious (0)     |
| <b>Hps4</b>   | rs32112489  | 5:112377955      | A   | -           | -   | -         | T        | -          | -         | -       | -       | Splice region variant | -           | -                | low      |                     |
| <b>Sez6l</b>  | rs32114817  | 5:112422009      | T   | -           | -   | -         | C        | -          | -         | -       | -       | Stop retained variant | -           | -                | low      |                     |
| <b>Sez6l</b>  | rs32116976  | 5:112425616      | C   | -           | -   | -         | -        | -          | -         | -       | T       | Splice region variant | -           | -                | low      |                     |
| <b>Sez6l</b>  | rs32122208  | 5:112472926      | G   | -           | -   | -         | -        | -          | -         | -       | A       | Splice region variant | -           | -                | low      |                     |
| <b>Sez6l</b>  | rs32118052  | 5:112475023      | G   | C           | -   | -         | -        | C          | -         | C       | C       | Splice region variant | -           | -                | low      |                     |
| <b>Sez6l</b>  | rs32118955  | 5:112475412      | C   | T           | -   | -         | -        | T          | -         | -       | T       | Missense variant      | C/N         | 91               | moderate | tolerated (0.44)    |
| <b>Myo18b</b> | rs212801037 | 5:112775403      | A   | -           | -   | -         | T        | -          | -         | -       | -       | Splice region variant | -           | -                | low      |                     |
| <b>Myo18b</b> | rs47968507  | 5:112802426      | G   | C           | -   | -         | -        | C          | C         | -       | -       | Missense variant      | L/V         | 1535             | moderate | tolerated (0.18)    |
| <b>Myo18b</b> | rs46076017  | 5:112809682      | T   | C           | C   | -         | -        | C          | C         | C       | -       | Missense variant      | T/A         | 1472             | moderate | tolerated (0.87)    |
| <b>Myo18b</b> | rs237692588 | 5:112837808      | T   | -           | -   | -         | C        | -          | -         | -       | -       | Missense variant      | T/A         | 1092             | moderate | tolerated (0.6)     |
| <b>Myo18b</b> | rs48666049  | 5:112837826      | G   | -           | -   | -         | C        | -          | -         | C       | -       | Missense variant      | Q/E         | 1086             | moderate | tolerated (0.8)     |
| <b>Myo18b</b> | rs234142160 | 5:112858503      | C   | -           | -   | -         | T        | -          | -         | -       | -       | Missense variant      | R/Q         | 847              | moderate | tolerated (1)       |
| <b>Myo18b</b> | rs48271099  | 5:112871438      | C   | -           | -   | -         | T        | -          | -         | -       | -       | Missense variant      | V/M         | 658              | moderate | tolerated (0.06)    |
| <b>Myo18b</b> | rs260627251 | 5:112871446      | G   | -           | -   | -         | T        | -          | -         | -       | -       | Missense variant      | T/K         | 655              | moderate | tolerated (0.12)    |
| <b>Myo18b</b> | rs220128630 | 5:112871546      | C   | -           | -   | -         | T        | -          | -         | -       | -       | Missense variant      | V/I         | 622              | moderate | tolerated (0.09)    |
| <b>Myo18b</b> | rs238856395 | 5:112871552      | C   | -           | -   | -         | T        | -          | -         | T       | -       | Missense variant      | V/I         | 620              | moderate | tolerated (0.69)    |
| <b>Myo18b</b> | rs51366779  | 5:112873984      | A   | -           | -   | -         | C        | -          | -         | C       | -       | Missense variant      | V/G         | 514              | moderate | tolerated-LC (0.44) |
| <b>Myo18b</b> | rs45640773  | 5:112874114      | C   | -           | -   | -         | T        | -          | -         | -       | -       | Missense variant      | A/T         | 471              | moderate | tolerated-LC (0.18) |
| <b>Myo18b</b> | rs244439177 | 5:112874302      | G   | -           | -   | -         | A        | -          | -         | -       | -       | Missense variant      | P/L         | 408              | moderate | tolerated-LC (0.08) |
| <b>Myo18b</b> | rs582288427 | 5:112874336      | G   | -           | -   | -         | A        | -          | -         | -       | -       | Missense variant      | P/S         | 397              | moderate | tolerated-LC (0.41) |
| <b>Myo18b</b> | rs584773560 | 5:112874338      | C   | -           | -   | -         | T        | -          | -         | -       | -       | Missense variant      | G/E         | 396              | moderate | tolerated-LC (0.37) |
| <b>Myo18b</b> | rs585945270 | 5:112874344      | G   | -           | -   | -         | A        | -          | -         | -       | -       | Missense variant      | P/L         | 394              | moderate | tolerated-LC (0.19) |
| <b>Myo18b</b> | rs580478289 | 5:112874362      | G   | -           | -   | -         | A        | -          | -         | -       | -       | Missense variant      | A/V         | 388              | moderate | tolerated-LC (0.22) |
| <b>Myo18b</b> | rs249974165 | 5:112874363      | C   | -           | -   | -         | A        | -          | -         | A       | -       | Missense variant      | A/S         | 388              | moderate | tolerated-LC (0.43) |
| <b>Myo18b</b> | rs212290244 | 5:112874384      | A   | -           | -   | -         | C        | -          | -         | -       | -       | Missense variant      | S/P         | 1369             | moderate | tolerated-LC (0.73) |
| <b>Myo18b</b> | rs47749211  | 5:112874531      | G   | -           | -   | -         | C        | -          | -         | -       | -       | Missense variant      | R/G         | 332              | moderate | tolerated-LC (0.01) |
| <b>Myo18b</b> | rs51932075  | 5:112874585      | A   | -           | -   | -         | G        | -          | -         | G       | -       | Missense variant      | W/R         | 314              | moderate | tolerated-LC (1)    |
| <b>Myo18b</b> | rs581501658 | 5:112874614      | G   | -           | -   | -         | A        | -          | -         | -       | -       | Missense variant      | P/L         | 304              | moderate | tolerated-LC (0.23) |
| <b>Myo18b</b> | rs257889290 | 5:112874803      | A   | -           | -   | -         | T        | -          | -         | T       | -       | Missense variant      | I/N         | 241              | moderate | tolerated-LC (0.09) |
| <b>Myo18b</b> | rs33706581  | 5:112875024      | A   | -           | -   | -         | C        | -          | -         | C       | -       | Missense variant      | D/E         | 167              | moderate | tolerated-LC (1)    |

**Table S6****The Jackson Laboratory nomenclature of the CC founder and RI strains used in this study**

| <b>ARC/GENIAD Strain Code</b> | <b>JAX Strain Code</b> |
|-------------------------------|------------------------|
| 129X1/SvJArc                  | 129S1/SvImJ            |
| A/JArc                        | A/J                    |
| C57BL/6JArc                   | C57BL/6J               |
| NOD/ShiLtJArc                 | NOD/ShiLtJ             |
| BEM_AG                        | CC032                  |
| BOM_GB                        | CC042                  |
| BOON_HF                       | CC008                  |
| CIS_AD                        | CC024                  |
| DAVIS_BA                      | CC012                  |
| DOD_AH                        | N/A                    |
| DONNELL_HA                    | N/A                    |
| FEW_FD                        | CC025                  |
| FIM_DF                        | CC061                  |
| FIV_AC                        | N/A                    |
| GALASUPREME_CE                | N/A                    |
| GIG_EF                        | CC013                  |
| GIT_GC                        | N/A                    |
| HAZ_FE                        | N/A                    |
| JUNIOR_GB                     | CC020                  |
| LUZ_FH                        | N/A                    |
| MERCURI_HF                    | N/A                    |
| NUK_AC                        | CC010                  |
| PAT_CD                        | N/A                    |
| PEF_EC                        | N/A                    |
| POH_DC                        | N/A                    |
| PUB_CD                        | CC056                  |
| SAT_GA                        | CC016                  |
| TAS_FE                        | CC026                  |
| TOFU_FB                       | CC027                  |
| TOP_DA                        | CC023                  |
| WAB2_DH                       | CC031                  |
| YOX_DE                        | N/A                    |

N/A – strain not maintained at the Jackson Laboratory depository

**Table S7****Abbreviations of the mouse strains employed in this publication**

| <b>ARC strains</b>   | <b>Abbreviation</b> |
|----------------------|---------------------|
| 129X1/SvJArc         | 129X1               |
| A/JArc               | AJ                  |
| C57BL/6JArc          | B6                  |
| NOD/ShiLtJArc        | NOD                 |
| <b>CC RI strains</b> |                     |
| BEM_AG               | BEM                 |
| BOM_GB               | BOM                 |
| BOON_HF              | BOON                |
| CIS_AD               | CIS                 |
| DAVIS_BA             | DAVIS               |
| DOD_AH               | DOD                 |
| DONNELL_HA           | DONNELL or DON      |
| FEW_FD               | FEW                 |
| FIM_DF               | FIM                 |
| FIV_AC               | FIV                 |
| GALASUPREME_CE       | GALASUPREME or GALA |
| GIG_EF               | GIG                 |
| GIT_GC               | GIT                 |
| HAZ_FE               | HAZ                 |
| JUNIOR_GB            | JUNIOR              |
| LUZ_FH               | LUZ                 |
| MERCURI_HF           | MERCURY             |
| NUK_AC               | NUK                 |
| PAT_CD               | PAT                 |
| PEF_EC               | PEF                 |
| POH_DC               | POH                 |
| PUB_CD               | PUB                 |
| SAT_GA               | SAT                 |
| TAS_FE               | TAS                 |
| TOFU_FB              | TOFU                |
| TOP_DA               | TOP                 |
| WAB2_DH              | WAB2                |
| YOX_DE               | YOX                 |



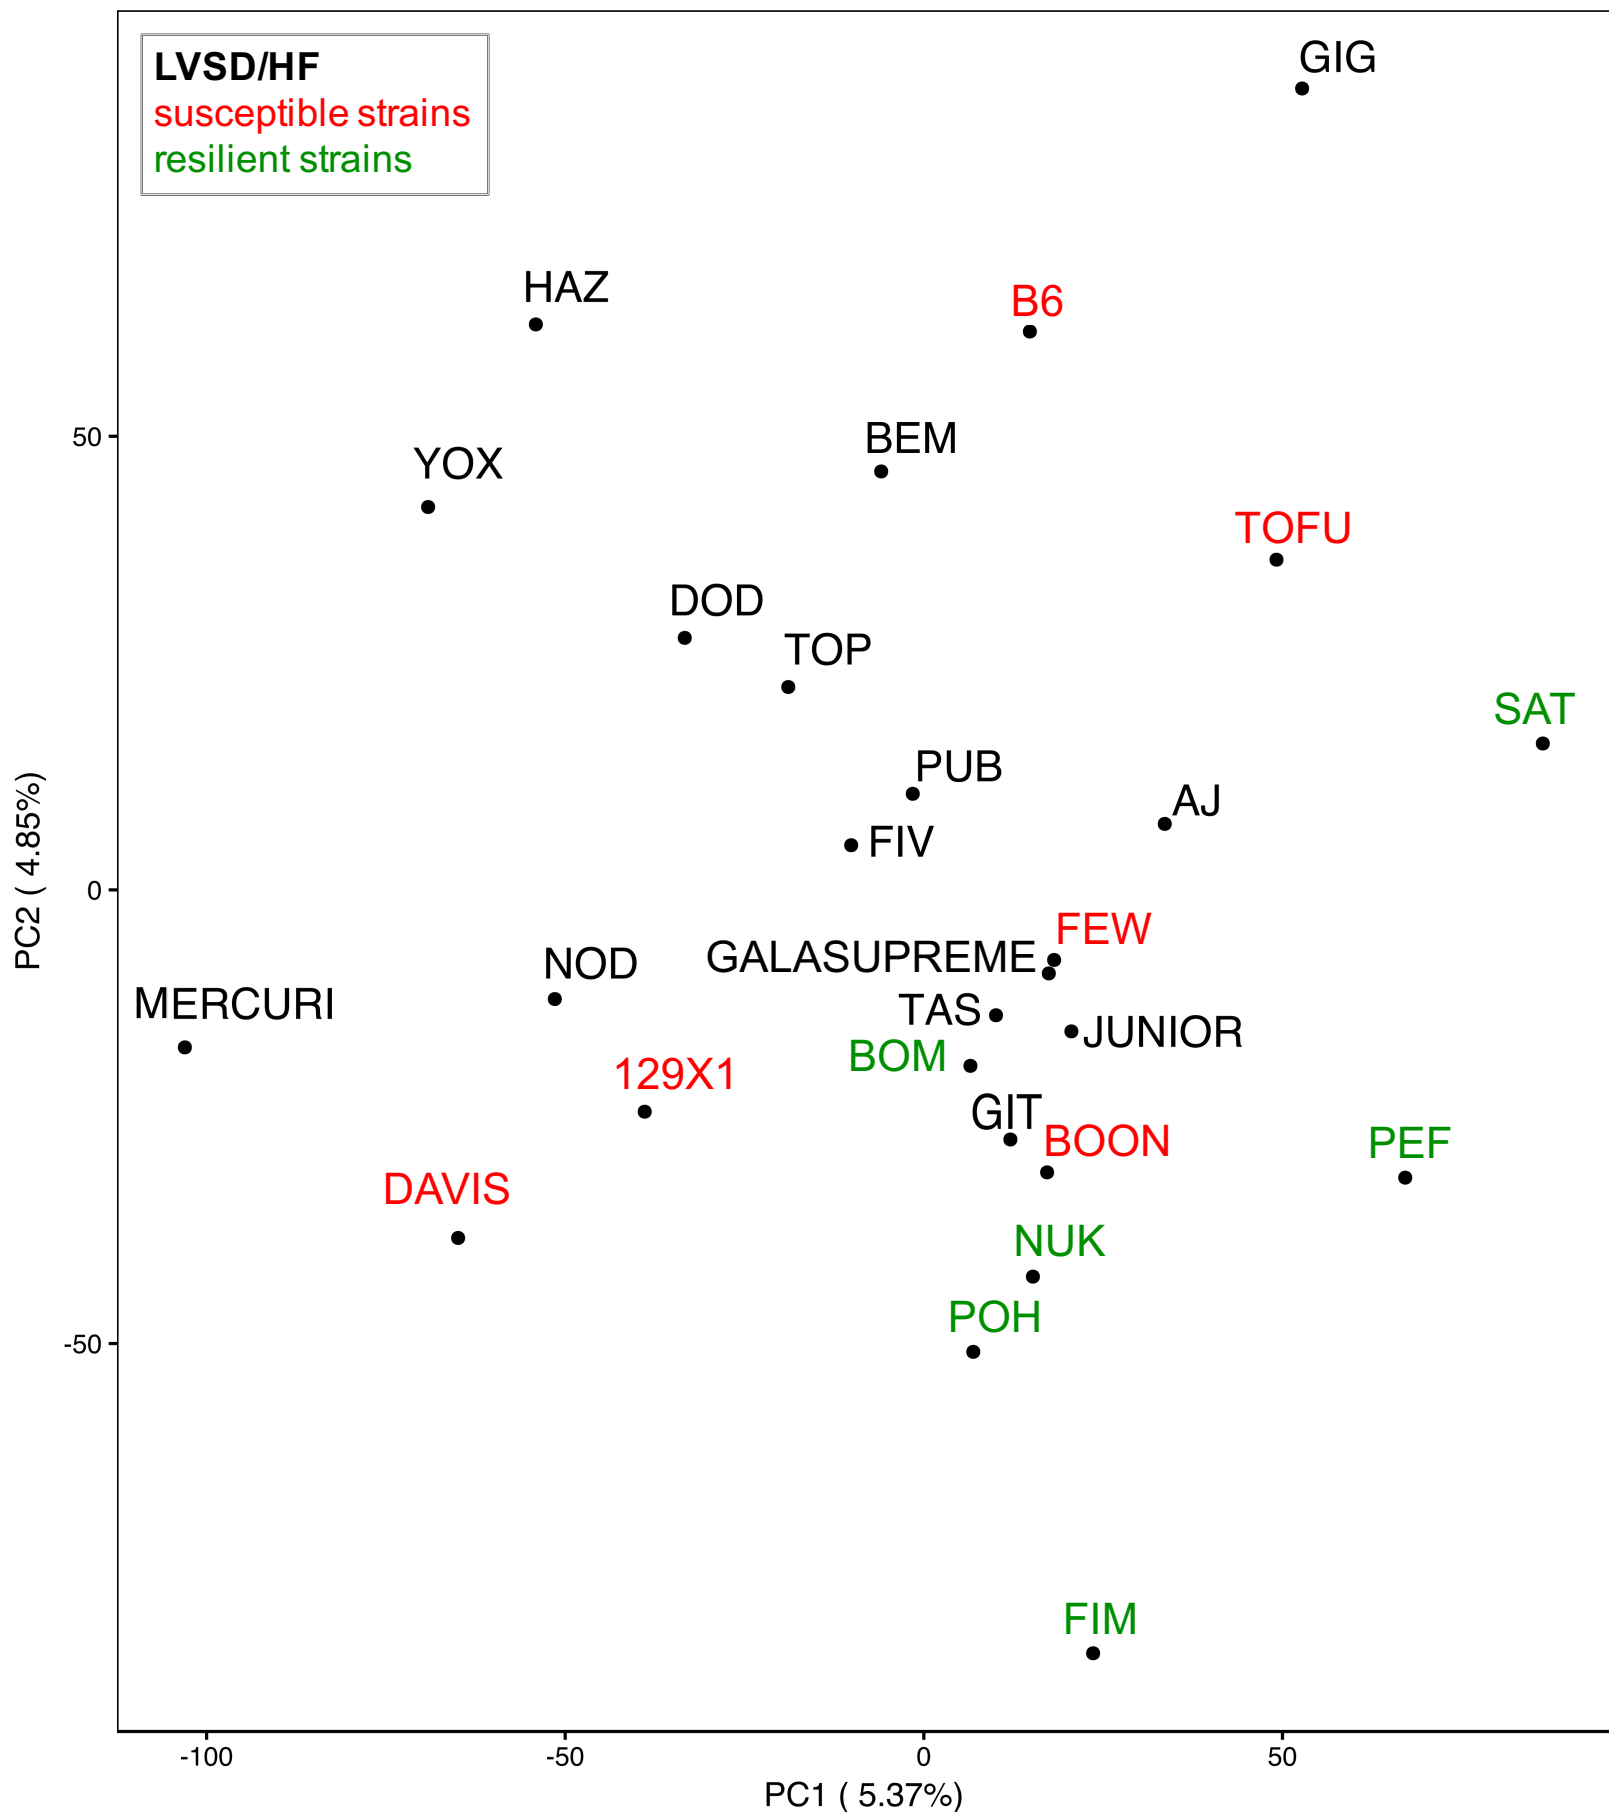

**Supplementary Figure S1. Principal Component Analysis (PCA) on whole-transcriptome profiles of 27 strains employed in this study.** The plot depicts a principal component analysis of the transcriptomes of uninjured hearts across 27 selected RI CC strains. The first principal component (PC1) explains 5.37% of the observed variation across strains while the second principal component (PC2) explains 4.85% of the variation. LVSD/HF resilient strains are highlighted in green, while LVSD/HF susceptible strains are highlighted in red.

**B6 (TOFU, BOON)**

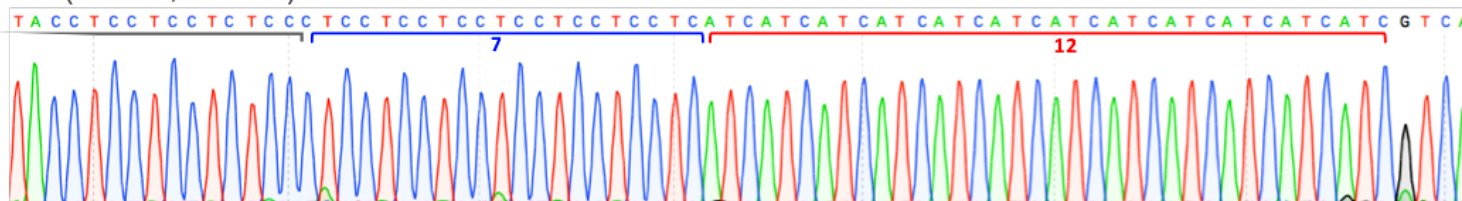

**CAST (GALA, DAVIS)**

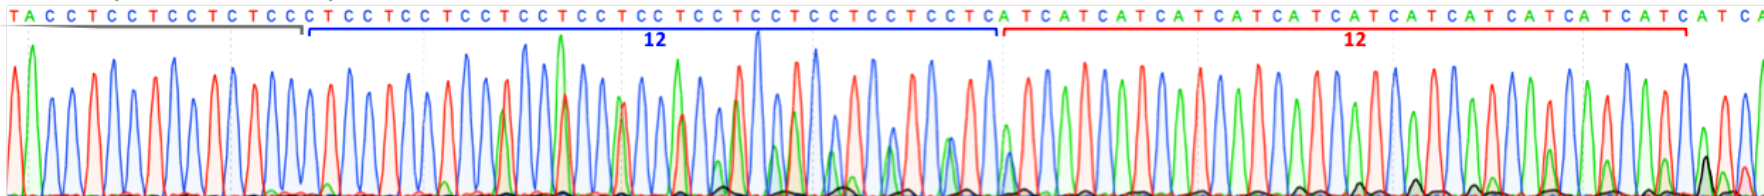

**PWK (FEW, HAZ)**

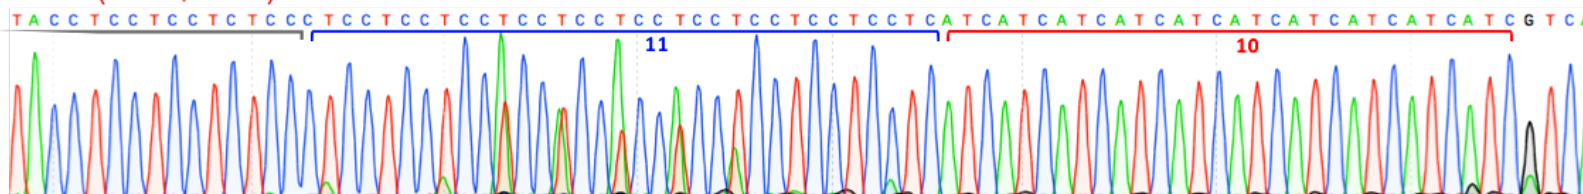

**AJ (DOD, FIM, LUZ)**

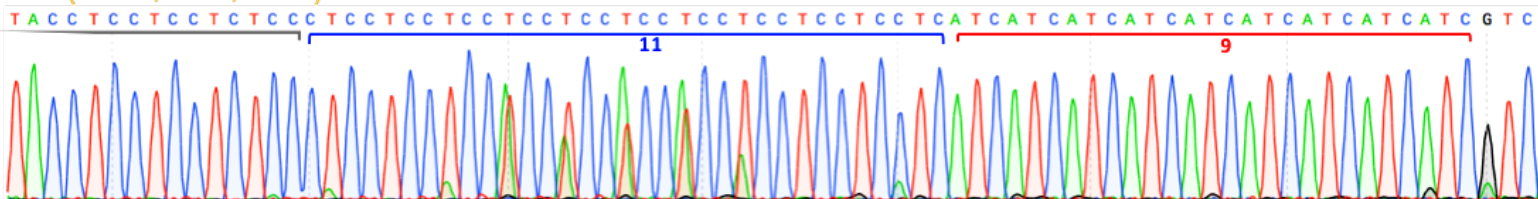

**129s (BEM, GIT, PAT)**

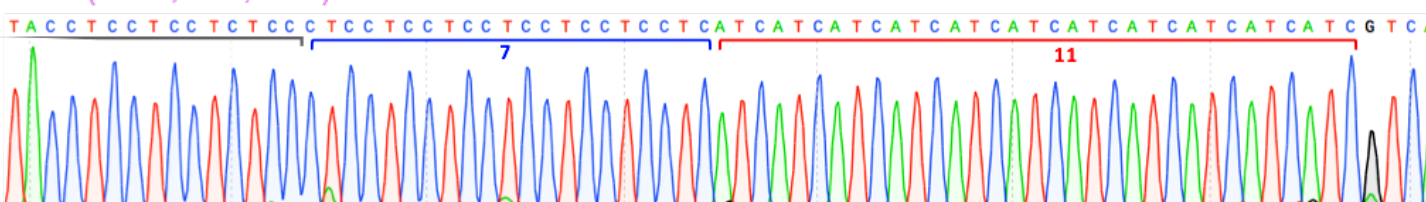

**NZO (NUK, GIG)**

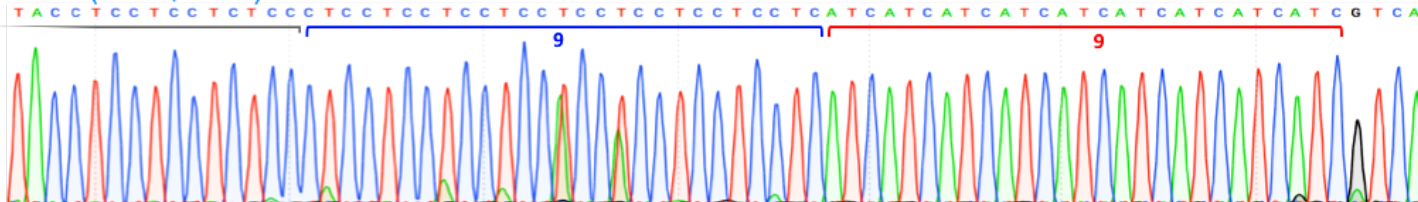

**WSB (BOM, SAT, DONNEL, FIV)**

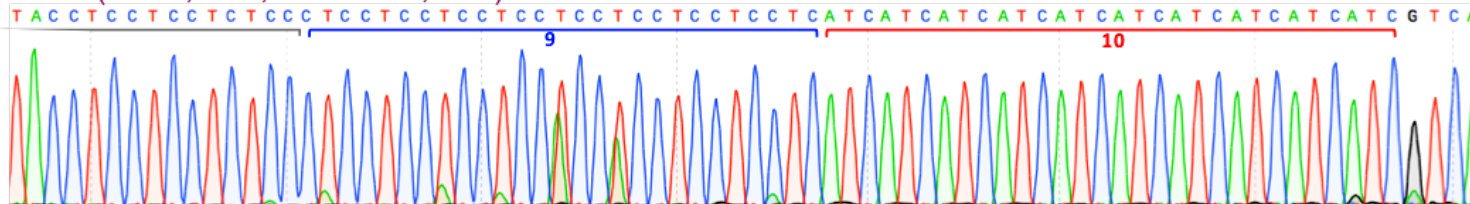

**NOD (POH, PEF, WAB2, TOP)**

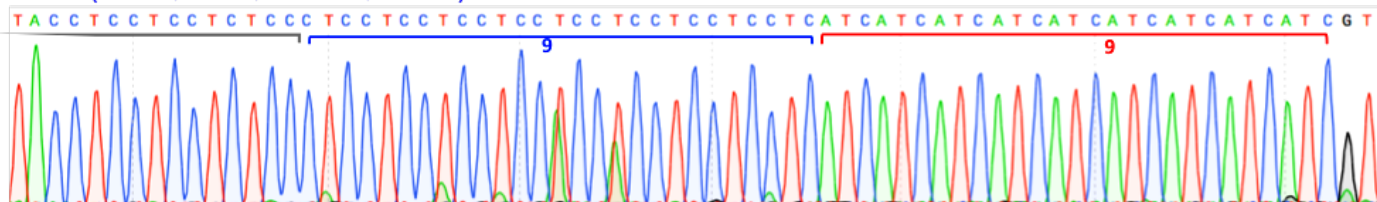

**Supplementary Figure S2. Intronic polymorphism in the *Myo18b* region associated with the LVD trait.**

Representative chromatograms of the 8 haplotypes in the intronic region (Chr5: 112856370-112856440) capturing microsatellite variation corresponding to polymorphisms rs578974233, rs582659088, rs585674637 and rs226166519.

Forward primer: 5'-AAGCCCATGAATGCACATTGG; reverse primer: 5'-AGACTTGGTGGGAAGAGGCAA

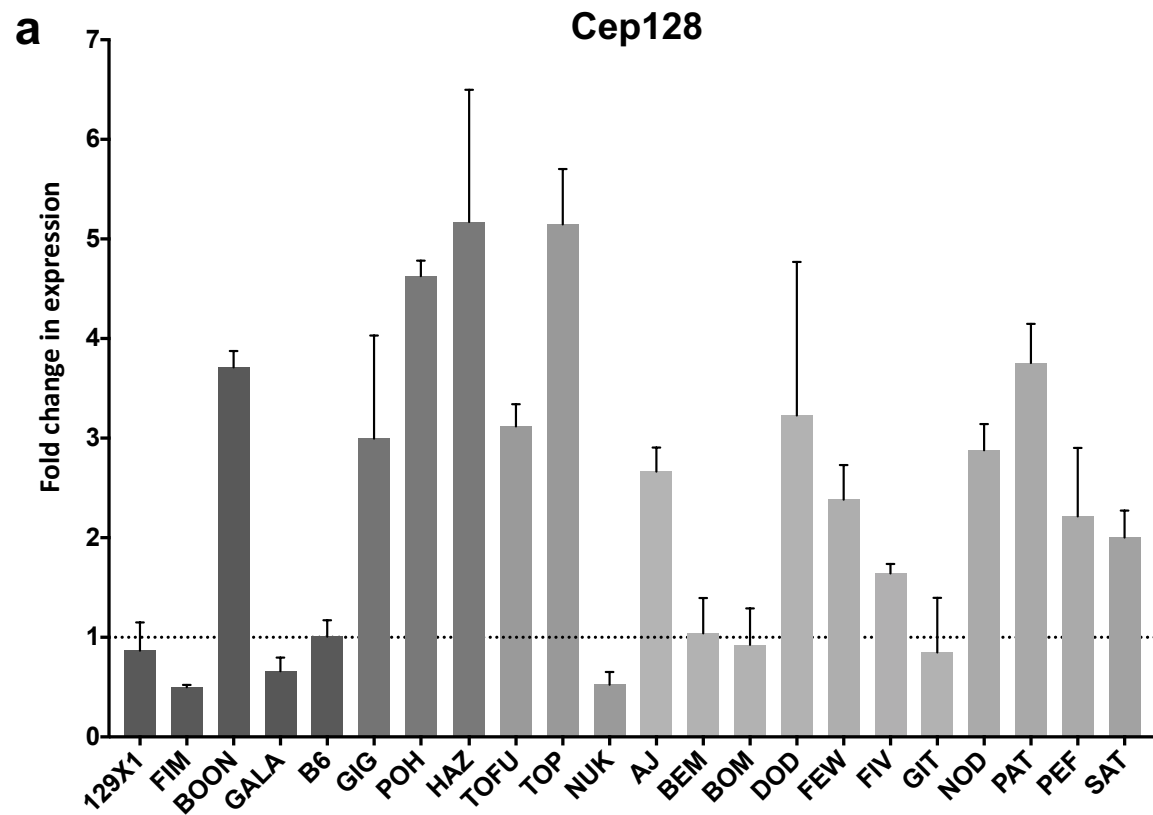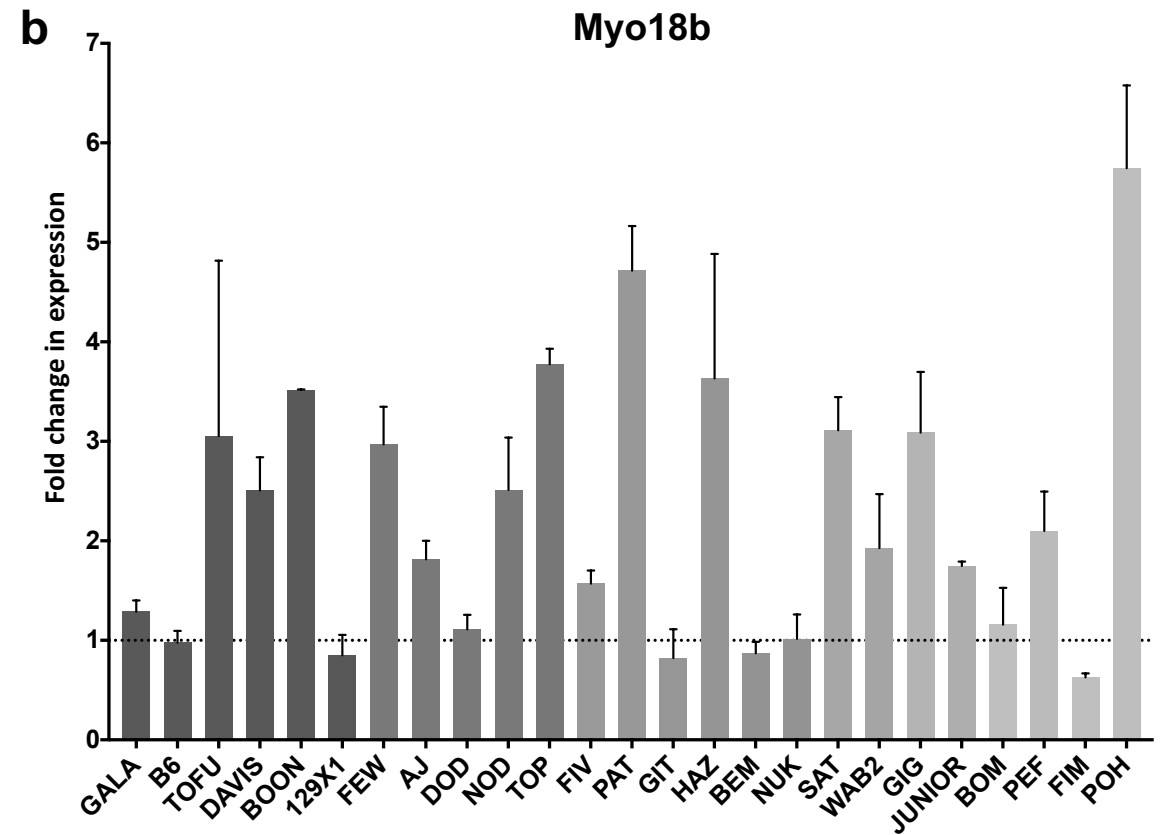

**Supplementary Figure S3. Expression levels of *Cep128* (a), *Myo18b* (b) and *Tnni3k* (c) genes in selected CC strains determined by RT-qPCR.**

Strains are ordered according to the quantitative expressivity of the trait: LV dilation for *Myo18b* and *Tnni3k*, and survival rate (occurrence of myocardial rupture) for *Cep128*. Expression levels are normalised against *Gapdh* and presented as fold expression change relative to expression in B6 strain, considered as 1. Data is presented as mean value  $\pm$  SD of 2-5 biological replicates.

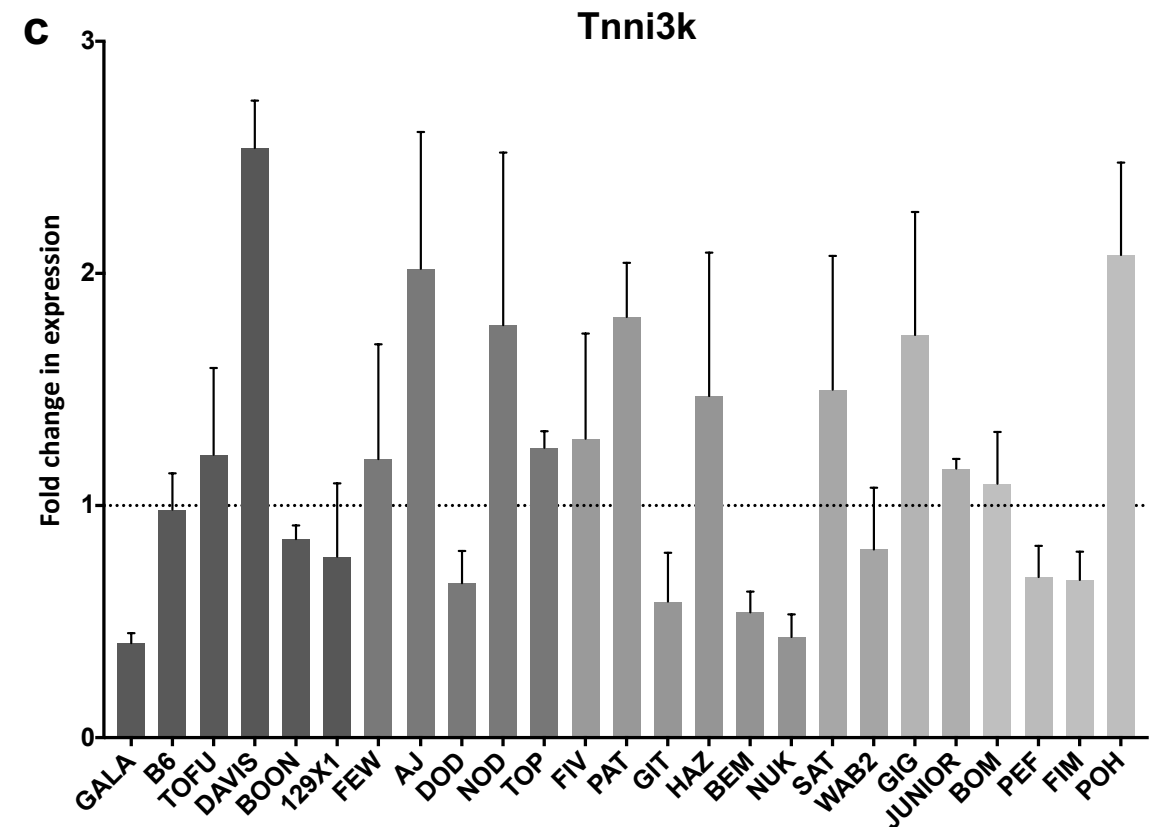

Supplement: 41536_2019_67_MOESM1_ESM.pdf [file 41536_2019_67_MOESM1_ESM.pdf]
